# Supplementary material for: TiN–Fe Vertically Aligned Nanocomposites Integrated on Silicon as a Multifunctional Platform toward Device Applications
Source: MDPI journal article supplement (doi:10.3390/cryst12060849), 2022-06-16
Supplement: s1 [file s1]

Supplementary Materials

# TiN–Fe Vertically Aligned Nanocomposites Integrated on Silicon as A Multifunctional Platform Toward Device Applications

Matias Kalaswad <sup>1</sup>, Di Zhang <sup>2</sup>, Bethany X. Rutherford <sup>2</sup>, Juanjuan Lu <sup>2</sup>, James P. Barnard <sup>2</sup>, Zihao He <sup>1</sup>, Juncheng Liu <sup>2</sup>, Haohan Wang <sup>3</sup>, Xiaoshan Xu <sup>3</sup> and Haiyan Wang <sup>1,2,\*</sup>

<sup>1</sup> School of Electrical and Computer Engineering, Purdue University, West Lafayette, IN 47907, USA; mkalaswa@purdue.edu (M.K.); he468@purdue.edu (Z.H.)

<sup>2</sup> School of Materials Engineering, Purdue University, West Lafayette, IN 47907, USA; zhan2923@purdue.edu (D.Z.); rutherfb@purdue.edu (B.X.R.); lu790@purdue.edu (Juanjuan Lu); barnardj@purdue.edu (J.P.B.); liu2551@purdue.edu (Jun-Cheng Liu)

<sup>3</sup> Department of Physics and Astronomy, University of Nebraska, Lincoln, NE 68588, USA; haohan.wang@huskers.unl.edu (H.W.); xiaoshan.xu@unl.edu (X.X.)

\* Correspondence: hwang00@purdue.edu

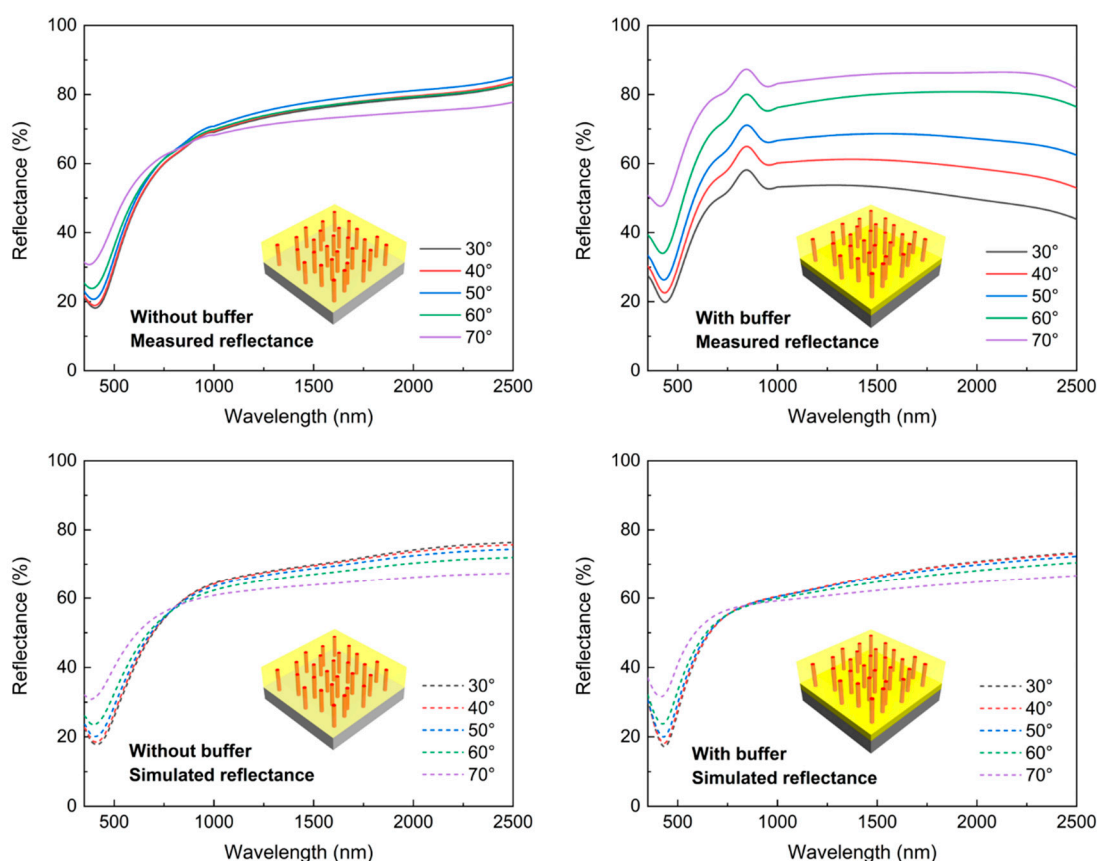

**Figure S1.** Measured reflectance (R%) spectra of the TiN–Fe nanocomposite films deposited on Si with and without a TiN buffer layer. Simulated R% spectra of the TiN–Fe films deposited on Si with and without a TiN buffer layer.
